# Supplementary material for: An Ago2-associated capped transcriptional start site small RNA suppresses adenovirus DNA replication
Source: PubMed Central journal article supplement — RNA. 2017 Nov;23(11):1700–11. doi: 10.1261/rna.061291.117 (PMC5648037; doi:10.1261/rna.061291.117), 2017-11
Supplement: supp_061291.117_Supplemental_Fig_S3.pdf [file supp_061291.117_Supplemental_Fig_S3.pdf]

### Supplemental Figure 3

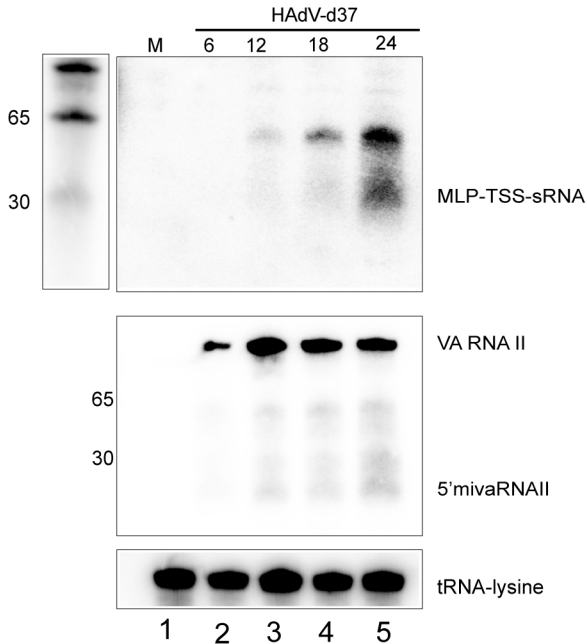

293-Flag-Ago2 cells were infected with HAdV-37 (5 FFU/cell) or mock infected. At different time points (6, 12, 18, 24 hpi) total cytoplasmic RNA was extracted and analyzed by Northern blotting using probes detecting the MLP-TSS-sRNA, 5' mivaRNAII and tRNA lysine.
