# Supplementary material for: An Ago2-associated capped transcriptional start site small RNA suppresses adenovirus DNA replication
Source: PubMed Central journal article supplement — RNA. 2017 Nov;23(11):1700–11. doi: 10.1261/rna.061291.117 (PMC5648037; doi:10.1261/rna.061291.117), 2017-11
Supplement: supp_061291.117_Supplemental_Fig_S4.pdf [file supp_061291.117_Supplemental_Fig_S4.pdf]

# Supplemental Figure 4

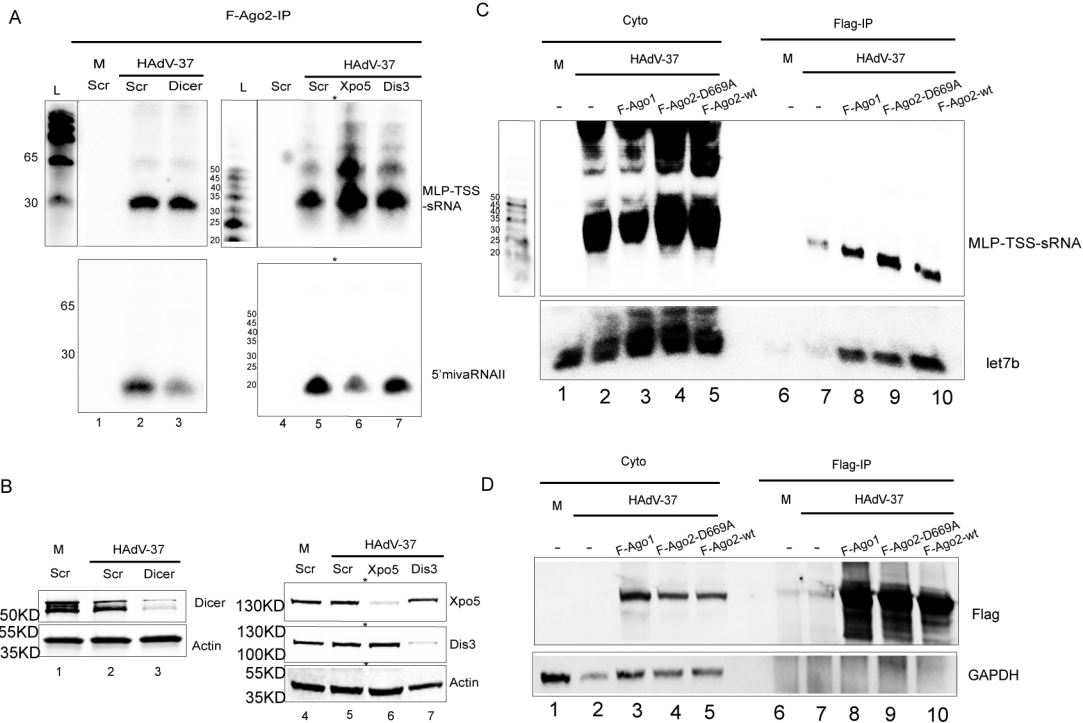

A)-B) An siRNA knockdown approach of proteins involved in miRNA processing and RNA export were used to probe the pathway of MLP-TSS-sRNA production, A) Northern blot analysis to determine the effect of knockdown on association of the HAAdV-37 MLP-TSS-sRNAs and 5' mivaRNAII with Ago2 complexes. B) Western blotting of the indicated proteins to measure the efficiency of siRNA knockdown. C)-D) HEK-293 cells were transfected with the indicated plasmids for 24 hours, followed by a mock infection or HAAdV-37 (5 FFU/cell) infection for 34 hours. C) Northern blot analysis of total cytoplasmic (Cyto) and Flag-Ago2-associated (Flag-IP) RNA. The membrane was probed against the MLP-TSS-sRNA and let7b. D) Western blot analysis of Flag-epitope tagged proteins (Ago1 and Ago2) and GAPDH in the Cyto and Flag-IP fractions.
