# Supplementary material for: An Ago2-associated capped transcriptional start site small RNA suppresses adenovirus DNA replication
Source: PubMed Central journal article supplement — RNA. 2017 Nov;23(11):1700–11. doi: 10.1261/rna.061291.117 (PMC5648037; doi:10.1261/rna.061291.117), 2017-11
Supplement: supp_061291.117_Supplemental_Table_S1.pdf [file supp_061291.117_Supplemental_Table_S1.pdf]

**Supplemental Table 1.** Summary of viral sRNA accumulation from the MLP-TSS region in different adenovirus serotypes.

|         | Pos. relative to the TSS | Geno. Pos. | % of Mapped Viral reads |               |
|---------|--------------------------|------------|-------------------------|---------------|
|         |                          |            | Cyto. Fraction          | RISC Fraction |
| HAdV-11 | -3                       | 5916       | 0.09                    | 0.01          |
|         | -2                       | 5917       | 0.00                    | 0.00          |
|         | -1                       | 5918       | 0.01                    | 0.00          |
|         | +1                       | 5919       | 0.49                    | 0.04          |
| HAdV-37 | -3                       | 5854       | 0.08                    | 0.14          |
|         | -2                       | 5855       | 0.01                    | 0.02          |
|         | -1                       | 5856       | 0.01                    | 0.01          |
|         | 1                        | 5857       | 0.72                    | 2.22          |
| HAdV-5  | -3                       | 6046       | 0.04                    | 0.00          |
|         | -2                       | 6047       | 0.00                    | 0.00          |
|         | -1                       | 6048       | 0.00                    | 0.00          |
|         | +1                       | 6049       | 0.19                    | 0.01          |
| HAdV-4  | -4                       | 5881       | 0.04                    | 0.00          |
|         | -3                       | 5882       | 0.00                    | 0.00          |
|         | -2                       | 5883       | 0.00                    | 0.00          |
|         | -1                       | 5884       | 0.00                    | 0.00          |
|         | +1                       | 5885       | 0.73                    | 0.03          |
