# Supplementary material for: An Ago2-associated capped transcriptional start site small RNA suppresses adenovirus DNA replication
Source: PubMed Central journal article supplement — RNA. 2017 Nov;23(11):1700–11. doi: 10.1261/rna.061291.117 (PMC5648037; doi:10.1261/rna.061291.117), 2017-11
Supplement: supp_061291.117_Supplemental_Table_S2.pdf [file supp_061291.117_Supplemental_Table_S2.pdf]

**Supplemental Table 2.** A list of northern blot probes, primers, siRNA and antibodies used in this study.

**List of siRNA and RNA oligonucleotides**

| Name                          | Sequence                                     | Application                                      |
|-------------------------------|----------------------------------------------|--------------------------------------------------|
| <b>siDicer</b>                | UGCUUGAAGCAGCUCUGGA<br>UUUGUUGCGAGGGCUGAU    | siRNA knockdown                                  |
| <b>siXPO5</b>                 | GGUUUGAUUUUGAUAGCGA<br>CCAGAUGUUUCGAACACUAAA | siRNA knockdown                                  |
| <b>siDis3</b>                 | UAUUCCUACAACUCUACU                           | siRNA knockdown                                  |
| <b>m7G-MLP-TSS-sRNA</b>       | m7G-<br>ACUCUCUUCCGCGUCGCUGUCCACGA<br>GCGCC  | 5' end m7G capped RNA oligonucleotide (31nt)     |
| <b>P-MLP-TSS-sRNA</b>         | P-<br>ACUCUCUUCCGCGUCGCUGUCCACGA<br>GCGCC    | 5' end Mono-phosphate RNA oligonucleotide (31nt) |
| <b>P-MLP-TSS-sRNA (trunc)</b> | P-ACUCUCUUCCGCGUCGUCG                        | 5' end Mono-phosphate RNA oligonucleotide(19nt)  |

**List of primers**

| Name                                                                   | Sequence                              | Application          |
|------------------------------------------------------------------------|---------------------------------------|----------------------|
| <b>HAdV-37 MLP-TSS-sRNA</b>                                            | TGGCGCTCGTGGACAGCGACGCGGAA<br>GAGAGT  | <b>Northern blot</b> |
| <b>HAdV-37 MLP-TSS-sRNA_20nt</b>                                       | ACAGCGACGCGGAAGAGAGT                  | <b>Northern blot</b> |
| <b>HAdV-37 VAII 5p</b>                                                 | TGGCGATGCTTCTCCAGACTACGGGCG<br>CGAGCC | <b>Northern blot</b> |
| <b>Let7b</b>                                                           | AACCACACAACCTACTACCTCA                | <b>Northern blot</b> |
| <b>tRNA lysine</b>                                                     | ACCGACTGAGCTATCCGGGC                  | <b>Northern blot</b> |
| <b>HAdV-37-VAII-f</b>                                                  | CCGTAGTCTGGAGAAGCATCG                 | <b>qPCR</b>          |
| <b>HAdV-37-VAII-r</b>                                                  | GGTCTTTAAATCGGCGGGGT                  | <b>qPCR</b>          |
| <b>HPRT1-f</b>                                                         | TTGCTTTCCTTGGTCAGGCA                  | <b>qRT-pcr</b>       |
| <b>HPRT1-r</b>                                                         | ATCCAACACTTCGTGGGGTC                  | <b>qRT-pcr</b>       |
| <b>HAdV-37-AdPol-f</b>                                                 | ATGGCCTTGGTTCAAAGTCACG                | <b>qRT-pcr</b>       |
| <b>HAdV-37-AdPol-r</b>                                                 | CGGCAGAGGCACGTCG                      | <b>qRT-pcr</b>       |
| <b>HAdV-37-pTP-f</b>                                                   | ATGGCCTTGAGCGTCAATGACT                | <b>qRT-pcr</b>       |
| <b>HAdV-37-pTP-r</b>                                                   | GGACGCGGTTCCAGATGTTG                  | <b>qRT-pcr</b>       |
| <b>Major late transcript (2<sup>nd</sup>-3<sup>rd</sup> leaders)-f</b> | GGGAATCCTCGATCGTCCG                   | <b>qRT-pcr</b>       |
| <b>Major late transcript (2<sup>nd</sup>-3<sup>rd</sup> leaders)-r</b> | CGATTGGCTAGACGCTTTCC                  | <b>qRT-pcr</b>       |

**List of Antibodies**

| Name                     | Dilution | Vendor    |
|--------------------------|----------|-----------|
| <b>Ago2</b>              | 1:1000   | Abnova    |
| <b>Dicer</b>             | 1:1000   | Abcam     |
| <b>Exportin 5</b>        | 1:1000   | Abcam     |
| <b>HAdV-5 Capsid</b>     | 1:5000   | Abcam     |
| <b>Nxf1/TAP</b>          | 1:1000   | Abcam     |
| <b>Actin</b>             | 1:1000   | Santacruz |
| <b>GAPDH</b>             | 1:10000  | Ambion    |
| <b>RNA Pol II(8WG16)</b> | 1:1000   | Abcam     |
